# Supplementary material for: Personal Vehicles Evaluated against Climate Change Mitigation Targets
Source: Atypon-hosted journal article supplement (doi:10.1021/acs.est.6b00177), 2016-09-27
Supplement: es6b00177_si_001.pdf [file es6b00177_si_001.pdf]

# Supporting Information

Personal vehicles evaluated against climate change mitigation targets

Marco Miotti\*, Geoffrey J. Supran<sup>†</sup>, Ella J. Kim<sup>‡</sup>, Jessika E. Trancik\*<sup>§</sup>

September 14, 2016

## Contents

|                                                                                            |           |
|--------------------------------------------------------------------------------------------|-----------|
| <b>S1 Discussion of uncertainties in greenhouse gas emission targets</b>                   | <b>S2</b> |
| <b>S2 Cost-carbon space of current light-duty vehicles under varying conditions</b>        | <b>S4</b> |
| S2.1 Costs and emissions under a low-carbon electricity scenario . . . . .                 | S4        |
| S2.2 Sensitivities of costs and emissions subject to various parameter uncertainties . . . | S6        |
| <b>S3 Calculation of emissions and costs</b>                                               | <b>S9</b> |
| S3.1 Emissions and costs of the fuel cycle . . . . .                                       | S9        |
| S3.2 Emissions and costs of the vehicle cycle . . . . .                                    | S10       |
| S3.3 Total emissions and costs per mile driven . . . . .                                   | S11       |
| S3.4 Parameters of each vehicle model . . . . .                                            | S11       |

## Content Summary

**Number of pages:** 20

**Number of figures:** 3

**Number of tables:** 5

---

\*Institute for Data, Systems, and Society (IDSS), Massachusetts Institute of Technology (MIT), Cambridge, Massachusetts 02139, United States

<sup>†</sup>Department of Materials Science & Engineering, Massachusetts Institute of Technology (MIT), Cambridge, Massachusetts 02139, United States

<sup>‡</sup>Department of Urban Studies & Planning, Massachusetts Institute of Technology (MIT), Cambridge, Massachusetts 02139, United States

<sup>§</sup>Santa Fe Institute, Santa Fe, New Mexico 87501, United States  
Contact: trancik@mit.edu

## **S1 Discussion of uncertainties in greenhouse gas emission targets**

The greenhouse gas (GHG) emission targets shown in Figures 1, 3 and 4 in the main article are subject to uncertainties, and sensitive to climate change policy choices. This chapter briefly discusses the major uncertainties and choices.

First, climate change mitigation targets (in terms of maximum average global warming compared to pre-industrial temperature levels) as well as the corresponding maximum globally allowed GHG emissions are subject to both scientific uncertainties and political debate. Less stringent climate change targets would lead to higher (less stringent) GHG emission targets for light-duty vehicles (LDVs).

Second, the allocation of globally permitted GHG emissions to specific countries is subject to debate as well. If fewer emissions are allocated to industrialized or Annex I countries, targets for LDVs in the U.S. would need to be lower.

Third, our derivation assumed that all GHGs associated with the materials supply chain for vehicle and fuel production are emitted within the U.S. In reality, this is not the case. For instance, a fraction of the emissions due to the production and distribution of each vehicle occur outside of the U.S., even if the final manufacturing process takes place within the U.S. Our U.S. emission targets are therefore somewhat conservative; that is, they are more stringent than they might in reality need to be. However, in terms of global climate change mitigation, this simplification in our method does not lessen the challenge of decarbonization; ultimately, it is the global carbon budget that counts, and production- and consumer-based emission schemes are only accounting devices. If domestic decarbonization efforts are measured in such a way as to neglect emissions embodied in trade, one must be careful not to overestimate apparent progress and underestimate the need for more stringent emissions reductions. Embodied carbon leakage has been estimated to constitute more than 25% of global emissions [1,2].

Fourth, the vehicle miles travelled (VMT) were assumed to follow the U.S. Energy Information Administration (EIA)-projected 0.9% increase per year [3]. If VMT are higher, the targets would need to be lower by the reciprocal of the same factor, and vice-versa. The trajectory of VMT by light-duty vehicles is linked to the development of VMT in other transportation sectors (see next point).

Finally, our targets assume that the shares of emissions allocated to each end-use sector do not change with time. If, as one example, VMT by passenger air travel increase significantly, and the carbon intensity per mile of air traffic cannot be mitigated considerably, other sectors may have to compensate by further reducing their GHG emissions so as to reach overall emissions targets. A modal shift from cars to air travel may decrease the VMT for cars as well, but not necessarily enough to compensate for the increase in air travel.

Combined, these factors can have a substantial impact on the GHG emission intensities of LDVs that will be required to meet climate change policy goals. The allocations of emissions across time, regions, and sectors are policy choices that have to be made. The future growth in VMT, on the other hand, cannot be controlled directly by GHG emission policies. Therefore, we conducted a sensitivity analysis for the targets with respect to the annual growth of VMT, assuming that the sectoral allocations stay constant. The results are depicted in Figures S1 and S2.

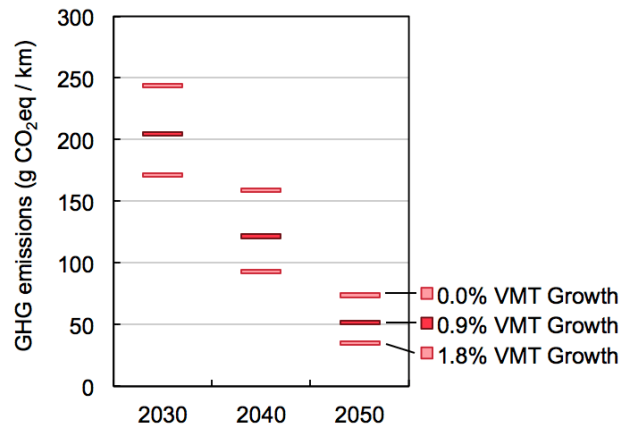

Figure S1: Sensitivity analysis for the GHG emission targets for personal LDVs with respect to the annual growth rate of vehicle miles traveled (VMT) between 2012 and the year of the target. 0.9% is the baseline case used in the main article.

## S2 Cost-carbon space of current light-duty vehicles under varying conditions

In Section S2.1, we map out the cost-carbon space under a low-carbon electricity scenario for different electricity prices. In Section S2.2, we map out the cost-carbon space considering uncertainties in five parameters: the lifetime of lithium-ion batteries; the discount rate; the drive cycles (driving patterns); the vehicle life in years; and the vehicle lifetime driving distance.

### S2.1 Costs and emissions under a low-carbon electricity scenario

Figure S2 shows the same information as Figure 1a in the main article, but under a scenario where electricity is produced from low-carbon sources only, resulting in a GHG emission intensity of electricity production and distribution of 24.3 gCO<sub>2</sub>eq/kWh (as opposed to the baseline case of 623 gCO<sub>2</sub>eq/kWh).

We observe that with a fully decarbonized electricity mix, BEVs are able to meet the 2050 target, while PHEVs are located in between the 2040 and the 2050 target (assuming that the fraction of the distance in which PHEVs are driven in charge depleting and charge sustaining modes remains constant at 57% and 43%, respectively).

The costs to the consumer of BEVs and PHEVs are fairly insensitive to electricity costs. We find that even a doubling of the electricity price does not change the cost comparison between BEVs and ICEVs substantially. This is because the cost of electricity for charging BEVs and PHEVs represents a relatively small fraction of total costs (see Figure 2 in the main article).

Finally, Figure S2 shows the GHG target ranges resulting from the uncertainty in future annual vehicle miles traveled by light-duty vehicles (see Figure S1). We note that our conclusions as to which technologies are able to meet what targets, and under what conditions, are robust to these uncertainties.

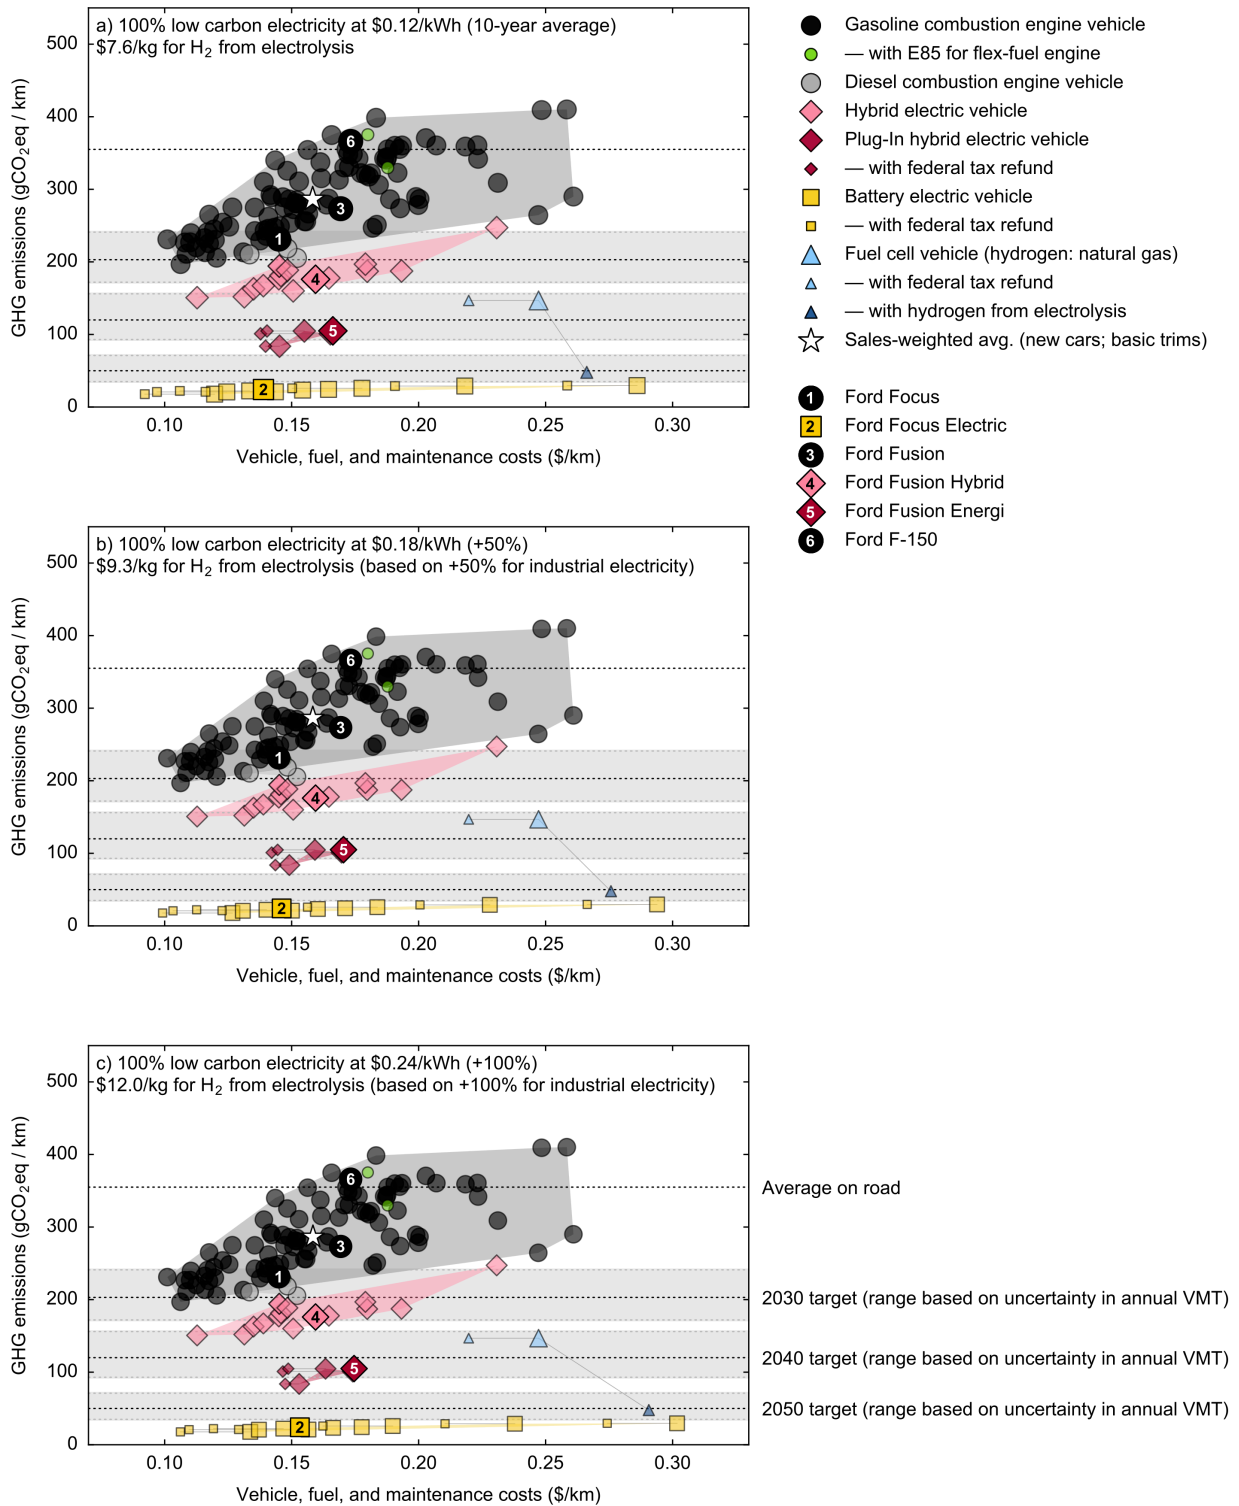

Figure S2: Same cost-carbon plot as Figure 1a in the main article, but with a low-carbon electricity mix (24 gCO<sub>2</sub>eq/kWh instead of 623 gCO<sub>2</sub>eq/kWh). Plots (a) - (c) represent different scenarios for the increase in electricity price for this electricity mix: (a) 0% (no increase); (b) 50% increase; and (c) 100% increase. The electricity price increases are also applied to industrial electricity prices that are used to calculate the costs of hydrogen (H<sub>2</sub>) produced with electrolysis. The uncertainty bands (shaded areas) for the targets reflect the uncertainties in future growth in annual vehicle miles traveled (VMT) shown in Figure S1.

## S2.2 Sensitivities of costs and emissions subject to various parameter uncertainties

Here we show the results of sensitivity analyses with respect to the multiple parameters shown in Table S1. The results are shown in Figure S3.

Our sensitivity analysis shows that a full replacement of the lithium-ion batteries in BEVs and PHEVs does not have a major effect on the lifecycle GHG emissions of BEVs and PHEVs (Figure S3b). In terms of costs, the impact is larger (assuming a battery price corresponding to \$200/kWh): on average, the total vehicle, fuel, and maintenance costs to the consumer of BEVs increase by about 7.5% when considering the battery replacement at the beginning of year 8. This implies that if a full battery replacement is necessary, and it has to be paid by the consumer, PHEVs, and especially BEVs, become, in some cases, less financially attractive.

We also show that a low discount rate benefits alternative-fuel vehicles, especially BEVs and PHEVs (Figure S3c and d). This is because the upfront costs (vehicle prices) are particularly large compared to the operating costs (fuel and maintenance) for these vehicle types. If consumers act myopically — that is, perceive future costs as relatively unimportant when making their purchasing decisions — ICEVs can be considerably more attractive than HEVs, PHEVs, and BEVs compared to a case where consumers evaluate costs with greater long-term financial focus. Of course, this is not always an option due to limited budget flexibility.

The drive cycle has a larger impact on the GHG emissions of ICEVs than on those of other powertrain technologies. This is because ICEV technology is the only technology that does not recuperate braking energy. Therefore, ICEV fuel economies are substantially worse in the city drive cycle than in the highway drive cycle. HEVs, PHEVs, and FCVs, on the other hand, have similar fuel economies in both drive cycles. Most BEVs even perform slightly better in the city cycle. For these reasons, the powertrain technologies are much closer together in terms of emissions when only highway driving is considered (Figure S3f) than when only city driving is considered (Figure S3e).

We also find that a shorter lifetime (with the same total lifetime distance driven) results in lower relative costs of alternative-fuel vehicles such as PHEVs and BEVs, because the high operating costs of ICEVs are discounted less strongly (Figure S3g and h). This may be relevant for fleet managers (as opposed to private vehicle owners) whose cars may have a shorter lifetime, at a higher annual driving distance, than privately owned cars.

While the costs of PHEVs and BEVs profit from a shorter lifetime for a given total lifetime distance driven, they profit from a longer lifetime distance (Figure S3i and j). This, again, may be relevant for fleet managers of taxi or car sharing services, as those vehicles tend to be driven for distances significantly above average. It should be noted, however, that reliability concerns for PHEVs, BEVs, and FCVs (in particular the batteries and the fuel cells) are particularly relevant for very long lifetime driving distances such as those shown in Figure S3j.

Table S1: Parameter values for sensitivity analyses described in section S2.2 and shown in Figure S3. The sensitivity analysis investigates the effect of varying each parameter between three different values (Default, Case 1, and Case 2) while holding all other parameters constant at their Default values. For each parameter, Case 1 is shown in the left plot of Figure S3 and Case 2 is shown in the right plot.

| Parameter                       | Default                             | Case 1 (left)             | Case 2 (right)             | Notes                                                                                                                                                                                                                                                                                                                                                                                                                                                                       |
|---------------------------------|-------------------------------------|---------------------------|----------------------------|-----------------------------------------------------------------------------------------------------------------------------------------------------------------------------------------------------------------------------------------------------------------------------------------------------------------------------------------------------------------------------------------------------------------------------------------------------------------------------|
| Lithium-Ion battery replacement | No replacement                      | No replacement            | 1 replacement              | We assume replacement costs of \$200/kWh. The replacement costs for the Nissan Leaf are currently \$230/kWh (\$5,500 for a 24 kWh battery [4]), those for the 60 kWh Tesla Model S are \$167/kWh (\$10,000 for a 60 kWh battery [5]). The costs are discounted, assuming that the replacement takes place after half the car's lifetime (beginning of year 8). Emissions for the production of the additional battery are calculated the same way as for the first battery. |
| Discount rate                   | 8%                                  | 0%                        | 16%                        | Some studies have found that consumers behave myopically when it comes to considering future fuel prices in their purchasing decisions for cars [6]. This can be described with a high discount rate.                                                                                                                                                                                                                                                                       |
| Driving pattern                 | Combined (55% city and 45% highway) | City only                 | Highway only               | We analyze two extreme cases of driving patterns: 100% city cycle (FTP-75) driving, and 100% highway cycle (HWFET) driving. We use the official reported adjusted fuel economy ratings to determine the fuel economies of the different models under these cycles.                                                                                                                                                                                                          |
| Lifetime in years               | 14 years                            | 7 years                   | 21 years                   | The lifetime distance driven (see parameter below) is assumed to be constant at 272,000 km. Therefore, the annual distance driven changes.                                                                                                                                                                                                                                                                                                                                  |
| Lifetime distance driven        | 272,600 km (169,400 miles)          | 136,000 km (84,500 miles) | 408,800 km (254,000 miles) | The assumed lifetime (see row above) is 14 years in each case, however the annual driving distance changes.                                                                                                                                                                                                                                                                                                                                                                 |

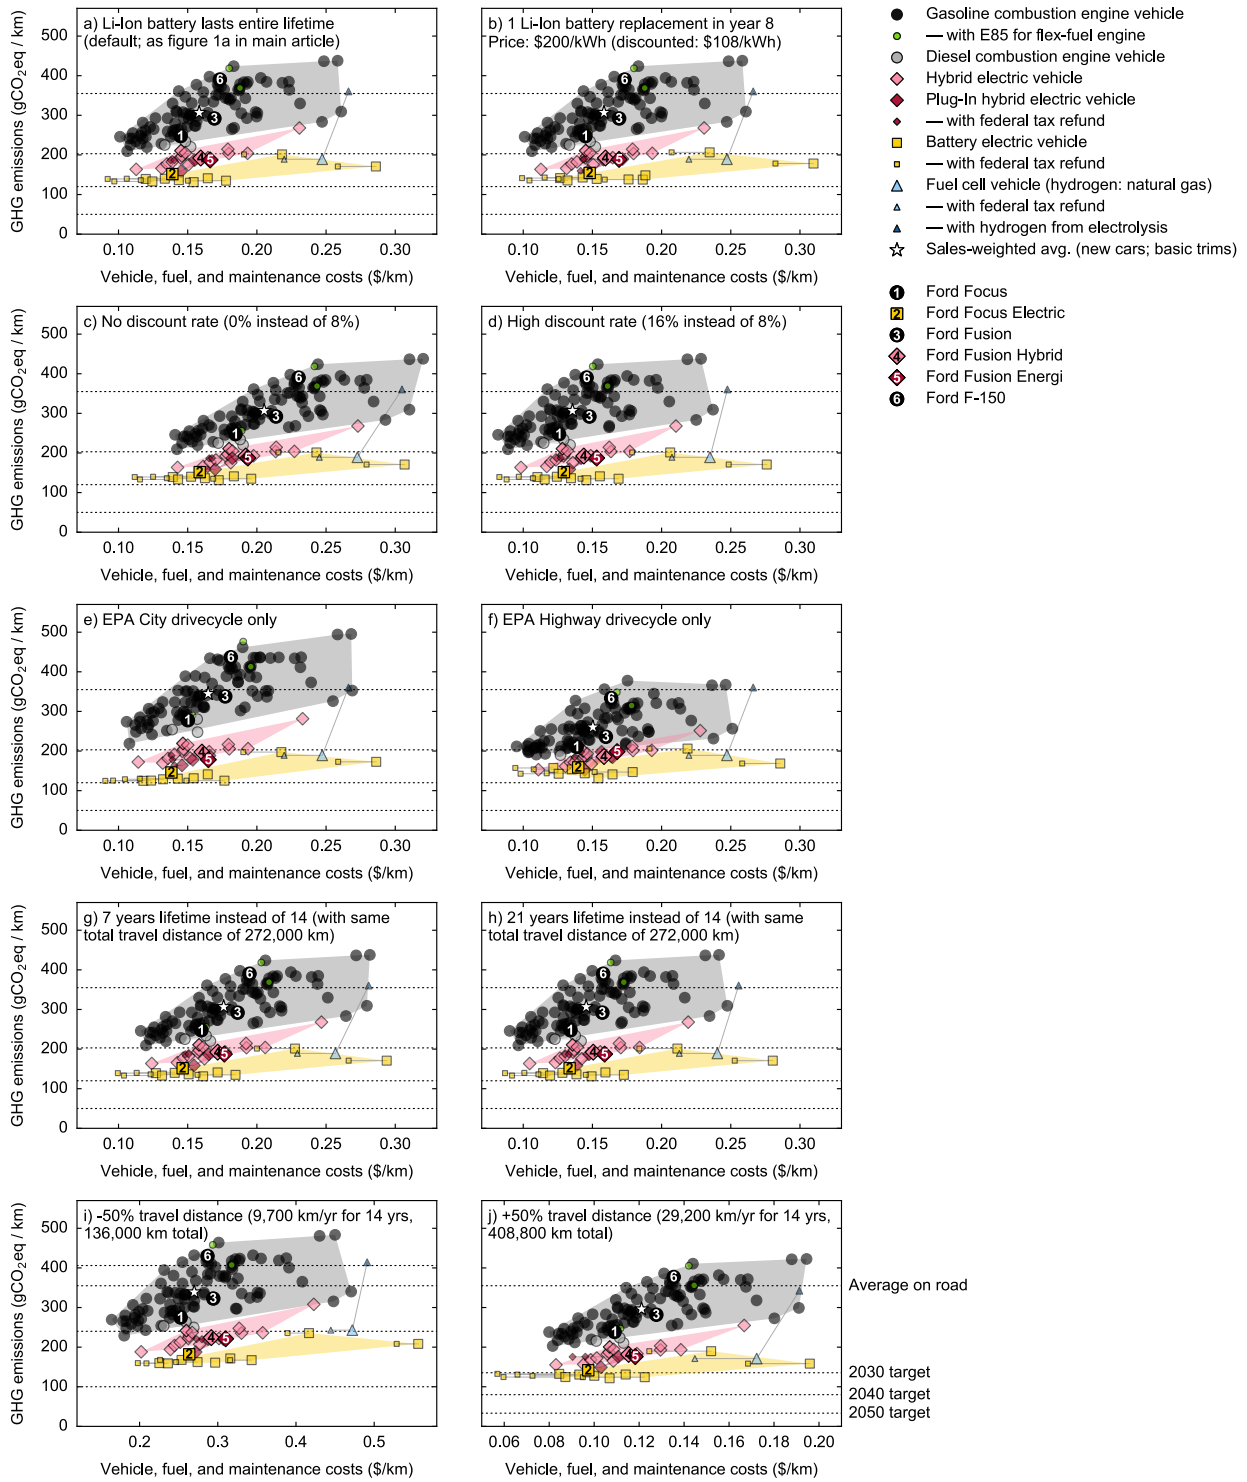

Figure S3: Results of the sensitivity analyses described in section S2.2. The parameters that are changed in each subfigure are shown in Table S1. The changes in lifetime travel distances (plots i and j) change the emission targets: the lower the lifetime driving distance, the higher (less stringent) the emission targets per mile driven. Therefore, the 2030 target is located above the current average emissions of cars on the road in plot i).



### S3 Calculation of emissions and costs

Emissions and costs were calculated using parametrized formulas. For GHG emissions, these formulas consist of a set of vehicle parameters (such as curb weight and fuel economy), and a set of intensity coefficients  $X_i$  that we derived from GREET, the lifecycle assessment (LCA) model we used [7]. These coefficients can represent emission intensities (amount of emission per amount of material), energy intensities (amount of electricity per amount of material), or mass intensities (amount of component mass per functional unit of that component).

Cost calculations are simpler, as they only consist of the vehicle purchasing price, the fuel costs (which is a product of fuel price and fuel consumption), and some annual maintenance cost rate. Future costs are discounted. The following section discusses these calculations in more detail.

#### S3.1 Emissions and costs of the fuel cycle

Generally, it was assumed that vehicles are fueled with regular gasoline; premium gasoline was only used if the manufacturer explicitly recommends or requires the use of premium gasoline for even the most basic trim. For PHEVs, we further assume that 57% of the distance is driven in charge depleting mode (using mostly electricity as a fuel), and 43% is driven in charge sustaining mode (using gasoline as a fuel, and electricity only from recuperation of braking energy). These values are consistent with GREET's default settings. For PHEVs with a serial-parallel powertrain configuration, 14% of the energy used during charge depleting mode comes from gasoline, and 86% from electricity in the battery. For PHEVs with a strictly serial configuration (only the Chevrolet Volt), we assume that all energy comes from the battery during charge depleting mode. We also note that the charging efficiency of PHEVs and BEVs is already included in the EPA fuel economy estimates for these vehicle types.

For gasoline, diesel, and electricity prices, we used a constant fuel price, based on a 10-year average of the inflation-adjusted monthly price in the U.S. between 2004 and 2013. This resulted in a regular gasoline price of \$3.14/gallon (averaged over all formulations), a premium gasoline price of \$3.41/gallon, a diesel price of \$3.39/gallon, and a residential electricity price of \$0.121/kWh or \$4.10/gallon-equivalent [8]. The E85 (corn ethanol) price was set to 20% below the regular gasoline price, resulting in \$2.51/gallon. We note that this is an estimated difference [9], which in reality varies considerably with time and region. The price of hydrogen was derived from a cost study by the National Renewable Energy Laboratory (NREL) [10]. Using linear interpolation of NREL's sensitivity analysis, we first adjusted hydrogen prices so that they were based on a 10-year average of industrial natural gas and electricity prices. We then added 0.40 cents per  $\text{MJ}_{eq}$  of taxes, or 48 cents per kg, to the hydrogen prices. This is the same as the current average tax on gasoline with respect to its lower heating value (48.5 cents per gallon, or 0.40 cents per  $\text{MJ}_{eq}$ ). The resulting hydrogen prices are \$4.11/kg (\$4.17/gallon-equivalent) for hydrogen from steam methane reforming (SMR), and \$7.59/kg (\$7.70/gallon-equivalent) for hydrogen from electrolysis, including pressurization and storage.

The carbon emissions of the fuel cycle per mile (not km) driven,  $E_{fuelcycle}$  (in  $\text{gCO}_2\text{eq/mile}$ ), are calculated as a function of the fuel consumption in miles per gallon (or miles per gallon-equivalent of gasoline), and the carbon intensity of electricity generation, as follows:

$$E_{fuelcycle} = C_1 + C_2 \cdot \frac{1}{FE} + C_3 \cdot \frac{1}{FE} \cdot E_{electricity} + C_4 + C_5 \cdot \frac{1}{FE} + C_6 \cdot \frac{1}{FE} \cdot E_{electricity} \quad (1)$$

where  $FE$  is the fuel economy in miles per gallon of gasoline-equivalent, and  $E_{electricity}$  is the carbon intensity of electricity generation and distribution in gCO<sub>2</sub>eq/kWh. The intensity coefficients  $C1$  to  $C6$  are extracted empirically from GREET and shown in Table S2. The fuel economies (FE) of all vehicles analyzed are shown in Table S4.

For PHEVs, the calculation is more complicated. There are two fuel economy values, and thus two emission intensities  $E_{fuelcycle}$ : One for the charge sustaining cycle (CS), when the car is driven in its ‘combustion-mode’, and one for the charge depleting cycle (CD), when the car is (mainly) driven in electric mode. Following GREET’s split, we calculate the GHG emissions of PHEVs assuming that 57% of the distance is driven in CD, and 43% in CS. In addition, there are two types of PHEV drivetrain configurations: Serial (also called extended range), and serial-parallel. While serial hybrids use only electricity as a power source in CD mode, serial-parallel hybrids typically use a certain amount of gasoline as well. This implies that the fuel economy rating for their CD mode does not exclusively refer to electricity consumption. For serial-parallel hybrids, we therefore assumed that 14% of the energy per mile used during CD comes from gasoline, and 86% from electricity, following GREET’s default values. The classification of each PHEV as either series or serial-parallel can be found in Table S4.

The costs of the different fuels are shown in Table S2 as well. The costs (average, minimum, and maximum) refer to the mean, minimum, and maximum monthly average of the respective fuel price, when adjusted for inflation, in 2013 dollars, observed between 2004 and 2013. The hydrogen prices are derived from the respective (industrial) natural gas and electricity prices.

### S3.2 Emissions and costs of the vehicle cycle

The carbon emissions of the vehicle cycle,  $E_{vehiclecycle}$  (in gCO<sub>2</sub>eq), are calculated as follows:

$$E_{vehiclecycle} = X_2 + X_3 \cdot E_{electricity} + m_{scaling} \cdot (X_4 + X_5 \cdot E_{electricity}) + P_{batt} \cdot (X_7 + X_8 \cdot E_{electricity}) + C_{batt} \cdot (X_{10} + X_{11} \cdot E_{electricity}) + P_{fc} \cdot (X_{13} + X_{14} \cdot E_{electricity}) \quad (2)$$

where  $E_{electricity}$  is the carbon intensity of electricity generation and distribution in gCO<sub>2</sub>eq/kWh,  $P_{batt}$  is the power in kW of the power battery (for HEVs and FCVs),  $E_{batt}$  is the capacity in kWh of the energy battery (for PHEVs and BEVs), and  $P_{fc}$  is the nominal power of the fuel cell system (for FCVs). The corresponding values for all vehicles are shown in Table S4.  $m_{scaling}$  is the remaining mass after subtracting from the curb weight the mass of the fixed components (tires, fluids, etc.), the battery, and the fuel cell system:

$$m_{scaling} = m_{curbweight} - X_1 - X_6 \cdot P_{batt} - X_9 \cdot E_{batt} - X_{12} \cdot P_{fc} \quad (3)$$

The curb weights for all vehicles analyzed are shown in Table S4. All the coefficients ( $X_1$  to  $X_{14}$ ) are extracted from GREET, as shown in Table S3. For all vehicles but FCVs, this approach

reproduces the exact results of GREET with the corresponding inputs. For FCVs, our results are only an approximation of GREET’s results. This is because in GREET, the power of the fuel cell ( $P_{fc}$ ) has interdependencies with some of the coefficients  $X_i$  due to how the materials mix is calculated. The  $X_i$  would therefore, in theory, be a function of  $P_{fc}$ . However, this only has a minor effect on the final GHG emissions (error in  $E_{vehiclecycle} \ll 1\%$ ), and can be neglected.

The vehicle costs are determined by the purchasing price and the costs for tires and regular maintenance. The purchasing price was assumed to be the manufacturer’s suggested retail prices (MSRPs, Table S4), while the annual tire and maintenance costs can be found in Table S3.

### S3.3 Total emissions and costs per mile driven

The lifecycle costs per mile (not km) driven,  $C$  (in US\$/mile), are calculated as follows:

$$C = \frac{C_{MSRP}}{L \cdot D} + \sum_{y=1}^L \frac{C_{fuel} \cdot FE^{-1} + C_{maintenance} \cdot D^{-1}}{(1+r)^{y-1}} \quad (4)$$

where  $C_{MSRP}$  is the purchasing price of the vehicle,  $L$  is the lifetime in years,  $D$  is the annual distance driven with each car,  $r$  is the discount rate,  $C_{fuel}$  is the fuel price in US\$ per gallon-equivalent of fuel,  $FE$  is the fuel consumption in gallon-equivalents per mile, and  $C_{maintenance}$  are the costs for tires and regular maintenance in US\$ per year.

Total greenhouse gas emissions per mile driven,  $E$ , are calculated as:

$$E = \frac{E_{vehiclecycle}}{L \cdot D} + E_{fuelcycle} \quad (5)$$

### S3.4 Parameters of each vehicle model

Table S4 displays the inputs used in Equations 1-3 for each individual vehicle analyzed, as well as the number of units sold in 2014, which was used to calculate sales-weighted averages. The vehicle data was obtained from Cars.com [11], and the sales data from goodcarbadcar.net for model-level sales data [12] and hybridcars.com for sales data specific to HEV, PHEV, and BEV trims [13]. For those models for which several trims and engine sizes are available, the basic (most affordable) trim is analyzed. An exception is made for models that are offered with different powertrain technologies (such as the Toyota Camry ICEV and the Toyota Camry HEV). In these cases, the trim of the technology with the smaller feature set is upgraded to match the basic trim of the technology with the more extensive feature set, allowing for a direct comparison of these models. An overview of these cases can be found in table S5.

The data for all vehicle models and their trims was gathered using an automated process. However, it was necessary to approximate the weight of each chosen trim, as only a range of lowest and highest curb weights was available, but not the weight of each specific trim. The curb weight was therefore calculated using a linear interpolation with respect to the MSRP: The lowest curb weight (lower end of range) was assigned to the trim with the lowest MSRP, the highest curb weight to the trim with the highest MSRP. The resulting curb weight was then assumed to scale linearly with the increase in MSRP. For vehicles where the trim with the lowest MSRP corresponds to the trim with the best fuel economy (about 80% of all vehicles), the chosen curb weight was therefore

simply the lower end of the range. The error in curb weight due to this approximation is smaller than 50 kg (< 5%) for almost all vehicles.

The fuel economy ratings represent the official combined ratings assigned by the EPA (55% city and 45% highway driving). These are adjusted ratings that take into account the use of auxiliaries, driving in cold and hot conditions, aggressive driving patterns, and charging losses of PHEVs and BEVs. [14]

Table S2: Greenhouse gas emission and cost factors of the fuel cycle. gGHG in the units of factors  $C_1$ ,  $C_2$ ,  $C_4$ , and  $C_5$  refers to greenhouse gas emissions in gCO<sub>2</sub>eq *without* emissions from electricity use, since the impact of electricity is accounted for separately by factors  $C_3$  and  $C_6$  in Eq. 1.  $\$/\text{gal}_{eq}$  refers to the price per one gallon-equivalent of gasoline; that is, the price per 121.9 MJ of lower heating value.

| Fuel                                      | Carbon Intensity Coefficients |                   |                  |                    |                   |                  | Costs                           |                                      |                                      |
|-------------------------------------------|-------------------------------|-------------------|------------------|--------------------|-------------------|------------------|---------------------------------|--------------------------------------|--------------------------------------|
|                                           | Feedstock                     |                   |                  | Combustion         |                   |                  | Average<br>\$/gal <sub>eq</sub> | Monthly min.<br>\$/gal <sub>eq</sub> | Monthly max.<br>\$/gal <sub>eq</sub> |
|                                           | $C_1$<br>gGHG/mile            | $C_2$<br>gGHG/gal | $C_3$<br>kWh/gal | $C_4$<br>gGHG/mile | $C_5$<br>gGHG/gal | $C_6$<br>kWh/gal |                                 |                                      |                                      |
| Biodiesel (Forest-Based Residue Biooil)   | 0.00                          | -6157             | 1.52             | 0.00               | 0                 | 8596             | 2.51                            | 1.49                                 | 3.56                                 |
| Bioethanol (E85 Corn Ethanol)             | 0.00                          | -755              | 1.14             | 2.18               | 8456              | 0                |                                 |                                      |                                      |
| Biogasoline (Forest-Based Residue Biooil) | 0.00                          | -5869             | 1.64             | 0.00               | 2                 | 8432             | 3.39                            | 1.94                                 | 5.17                                 |
| Diesel                                    | 0.00                          | 1709              | 0.49             | 0.20               | 8871              | 0                |                                 |                                      |                                      |
| Electricity for charging BEV and PHEV     | 0.00                          | 0                 | 32.88            | 0.00               | 0                 | 0                | 4.10                            | 3.48                                 | 4.50                                 |
| Gasoline Premium                          | 0.00                          | 1857              | 0.59             | 2.18               | 8607              | 0                | 3.41                            | 2.14                                 | 4.73                                 |
| Gasoline Regular                          | 0.00                          | 1857              | 0.59             | 2.18               | 8607              | 0                | 3.14                            | 1.86                                 | 4.47                                 |
| H2 from Electrolysis                      | 0.00                          | 0                 | 52.29            | 0.00               | 0                 | 0                | 7.47                            | 7.11                                 | 7.77                                 |
| H2 from Natural Gas                       | 0.00                          | 11478             | 4.30             | 3.27               | 0                 | 0                | 4.05                            | 3.62                                 | 6.03                                 |

Table S3: Greenhouse gas emission and cost factors of the vehicle cycle. gGHG in the units of factors X2, X4, X7, X10, and X13 refer to greenhouse gas emissions in gCO<sub>2</sub>eq *without* emissions from electricity use, since the impact of electricity is accounted for separately by factors X3, X5, X8, X11, and X14.

| Class         | Carbon Intensity Coefficients    |            |           |               |              |             |               |              |              |                 |                |              |                  |               |       | Costs       |
|---------------|----------------------------------|------------|-----------|---------------|--------------|-------------|---------------|--------------|--------------|-----------------|----------------|--------------|------------------|---------------|-------|-------------|
|               | Fixed parts (Tires, Fluids, etc) |            |           | Scaling Parts |              |             | Power Battery |              |              | Energy Battery  |                |              | Fuel Cell System |               |       | Tires/Main. |
|               | X1<br>kg                         | X2<br>gGHG | X3<br>kWh | X4<br>gGHG/kg | X5<br>kWh/kg | X6<br>kg/kW | X7<br>gGHG/kW | X8<br>kWh/kW | X9<br>kg/kWh | X10<br>gGHG/kWh | X11<br>kWh/kWh | X12<br>kg/kW | X13<br>gGHG/kW   | X14<br>kWh/kW | \$/yr |             |
| Car (ICEV)    | 58.76                            | 1,716      | 1,120     | 2.40          | 2.25         | 0.00        | 0.00          | 0.00         | 0.00         | 0.00            | 0.00           | 0.00         | 0.00             | 0.00          | 0.00  | 895.50      |
| SUV (ICEV)    | 80.51                            | 2,301      | 1,244     | 2.36          | 2.25         | 0.00        | 0.00          | 0.00         | 0.00         | 0.00            | 0.00           | 0.00         | 0.00             | 0.00          | 0.00  | 1,012.50    |
| PickUp (ICEV) | 80.51                            | 2,301      | 1,244     | 2.38          | 2.24         | 0.00        | 0.00          | 0.00         | 0.00         | 0.00            | 0.00           | 0.00         | 0.00             | 0.00          | 0.00  | 1,012.50    |
| Car (HEV)     | 42.39                            | 1,640      | 1,106     | 2.40          | 2.37         | 1.25        | 5.01          | 6.22         | 0.00         | 0.00            | 0.00           | 0.00         | 0.00             | 0.00          | 0.00  | 895.50      |
| SUV (HEV)     | 59.38                            | 2,203      | 1,226     | 2.39          | 2.36         | 1.25        | 5.01          | 6.22         | 0.00         | 0.00            | 0.00           | 0.00         | 0.00             | 0.00          | 0.00  | 1,012.50    |
| PickUp (HEV)  | 59.38                            | 2,203      | 1,226     | 2.39          | 2.37         | 1.25        | 5.01          | 6.22         | 0.00         | 0.00            | 0.00           | 0.00         | 0.00             | 0.00          | 0.00  | 1,012.50    |
| Car (PHEV)    | 42.39                            | 1,656      | 1,174     | 2.41          | 2.38         | 0.00        | 0.00          | 0.00         | 9.43         | 33.62           | 24.69          | 0.00         | 0.00             | 0.00          | 0.00  | 771.25      |
| SUV (PHEV)    | 59.38                            | 2,219      | 1,294     | 2.40          | 2.37         | 0.00        | 0.00          | 0.00         | 9.43         | 33.62           | 24.69          | 0.00         | 0.00             | 0.00          | 0.00  | 873.75      |
| PickUp (PHEV) | 59.38                            | 2,219      | 1,294     | 2.40          | 2.39         | 0.00        | 0.00          | 0.00         | 9.43         | 33.62           | 24.69          | 0.00         | 0.00             | 0.00          | 0.00  | 873.75      |
| Car (BEV)     | 35.25                            | 1,140      | 1,141     | 2.40          | 2.41         | 0.00        | 0.00          | 0.00         | 7.52         | 24.50           | 14.77          | 0.00         | 0.00             | 0.00          | 0.00  | 647.00      |
| SUV (BEV)     | 50.30                            | 1,471      | 1,246     | 2.38          | 2.39         | 0.00        | 0.00          | 0.00         | 7.52         | 24.50           | 14.77          | 0.00         | 0.00             | 0.00          | 0.00  | 735.00      |
| PickUp (BEV)  | 50.30                            | 1,471      | 1,246     | 2.37          | 2.40         | 0.00        | 0.00          | 0.00         | 7.52         | 24.50           | 14.77          | 0.00         | 0.00             | 0.00          | 0.00  | 735.00      |
| Car (FCV)     | 35.25                            | 1,124      | 1,074     | 2.41          | 2.43         | 1.25        | 5.01          | 6.22         | 0.00         | 0.00            | 0.00           | 5.00         | 56.48            | 40.89         | 0.00  | 647.00      |
| SUV (FCV)     | 50.30                            | 1,455      | 1,179     | 2.39          | 2.42         | 1.25        | 5.01          | 6.22         | 0.00         | 0.00            | 0.00           | 5.00         | 56.48            | 40.89         | 0.00  | 735.00      |
| PickUp (FCV)  | 50.30                            | 1,455      | 1,179     | 2.38          | 2.43         | 1.25        | 5.01          | 6.22         | 0.00         | 0.00            | 0.00           | 5.00         | 56.48            | 40.89         | 0.00  | 735.00      |

Table S4: Input data for basic trims of all vehicles analyzed [11–13]. For each model, the most basic (affordable) trim is chosen, except for the models shown in Table S5. Cweight = curb weight; FE = Fuel Economy; FE/2 = Fuel Economy in charge depleting (CD) mode for PHEVs; MPG = miles per gallon; MRSP = Manufacturer Recommended Selling Price; Ftax = federal tax refund; PBatt = power battery (HEV and FCV); Ebatt = energy battery (PHEVs and BEVs); FC = fuel cell power; PCon = Plug-in Hybrid (PHEV) drivetrain configuration (ser = serial, s-p = serial-parallel); Grs = number of gears; Pwr = nominal engine/motor power in hp (horsepower). Within ‘fuel’ column: Prem. Gas. = premium gasoline; SMR = steam methane reforming; Elysis = electrolysis; AS manual = auto-shift manual.

| Description             |             | Input   |                |      |            |         |     |      |          |         |       |       |     |                 | Trim Information |     |     |
|-------------------------|-------------|---------|----------------|------|------------|---------|-----|------|----------|---------|-------|-------|-----|-----------------|------------------|-----|-----|
| Model                   | Trim        | # Sold  | Class          | Type | Fuel       | Cweight | FE  | FE/2 | MSRP     | Ftax    | Pbatt | Ebatt | FC  | PCon            | Transmission     | Grs | Pwr |
|                         |             |         |                |      |            | kg      | MPG | MPG  | US\$     | US\$    | kW    | kWh   | kW  |                 |                  |     | hp  |
| Acura MDX               | 3.5L        | 65,603  | Mid-size SUV   | ICEV | Prem. Gas. | 1826    | 23  |      | \$42,290 |         |       |       |     |                 | 6-spd automatic  | 6   | 290 |
| BMW 3-Series & 4-Series | i           | 142,232 | Compact Car    | ICEV | Prem. Gas. | 1495    | 28  |      | \$32,750 |         |       |       |     |                 | 8-spd automatic  | 4   | 180 |
| BMW 5-Series            | i           | 52,704  | Mid-size Car   | ICEV | Prem. Gas. | 1730    | 27  |      | \$49,500 |         |       |       |     |                 | 8-spd automatic  | 4   | 240 |
| BMW i3                  | Base        | 6,092   | Subcompact Car | BEV  | Gasoline   | 1270    | 124 |      | \$41,350 | \$7,500 |       | 22    |     | 1-spd automatic | 0                | 170 |     |
| Buick Enclave           | Convenience | 62,300  | Full-size SUV  | ICEV | Gasoline   | 2143    | 20  |      | \$38,890 |         |       |       |     |                 | 6-spd automatic  | 6   | 288 |
| Buick LaCrosse          | Base        | 51,468  | Mid-size Car   | ICEV | Gasoline   | 1704    | 29  |      | \$33,535 |         |       |       |     |                 | 6-spd automatic  | 4   | 182 |
| Cadillac SRX            | Base        | 53,578  | Mid-size SUV   | ICEV | Gasoline   | 1940    | 20  |      | \$37,605 |         |       |       |     |                 | 6-spd automatic  | 6   | 308 |
| Chevrolet Bolt***       | 0           | 0       | Subcompact Car | BEV  | Gasoline   | 1624    | 115 |      | \$37,500 |         |       | 60    |     | 1-spd automatic | 0                | 201 |     |
| Chevrolet Camaro        | LS w/1LS    | 86,297  | Sports Car     | ICEV | Gasoline   | 1679    | 21  |      | \$23,555 |         |       |       |     |                 | 6-spd manual     | 6   | 323 |
| Chevrolet Cruze         | 2LT Auto    | 273,060 | Compact Car    | ICEV | Gasoline   | 1533    | 30  |      | \$22,580 |         |       |       |     |                 | 6-spd automatic  | 4   | 138 |
| Chevrolet Cruze Diesel  | Diesel      | 0       | Compact Car    | ICEV | Diesel     | 1574    | 33  |      | \$24,985 |         |       |       |     |                 | 6-spd automatic  | 4   | 151 |
| Chevrolet Equinox       | LS          | 242,242 | Mid-size SUV   | ICEV | Gasoline   | 1705    | 26  |      | \$24,440 |         |       |       |     |                 | 6-spd automatic  | 4   | 182 |
| Chevrolet Impala        | LS w/1LS    | 140,280 | Full-size Car  | ICEV | Gasoline   | 1669    | 25  |      | \$26,860 |         |       |       |     |                 | 6-spd automatic  | 4   | 195 |
| Chevrolet Malibu        | LS w/1LS    | 188,519 | Mid-size Car   | ICEV | Gasoline   | 1539    | 29  |      | \$22,340 |         |       |       |     |                 | 6-spd automatic  | 4   | 196 |
| Chevrolet Silverado     | w/1WT       | 529,755 | Pickup         | ICEV | Gasoline   | 2072    | 20  |      | \$25,575 |         |       |       |     |                 | 6-spd automatic  | 6   | 285 |
| Chevrolet Sonic         | LS Manual   | 93,518  | Subcompact Car | ICEV | Gasoline   | 1220    | 29  |      | \$14,170 |         |       |       |     |                 | 5-spd manual     | 4   | 138 |
| Chevrolet Spark         | 1LT Auto    | 38,014  | Subcompact Car | ICEV | Gasoline   | 1059    | 33  |      | \$14,995 |         |       |       |     |                 | 2-spd CVT        | 4   | 84  |
| Chevrolet Spark EV      | 1LT         | 1,145   | Subcompact Car | BEV  | Gasoline   | 1356    | 119 |      | \$26,685 | \$7,500 |       | 19    |     | 1-spd automatic | 0                | 130 |     |
| Chevrolet Suburban      | LS          | 55,009  | Full-size SUV  | ICEV | Gasoline   | 2574    | 17  |      | \$46,300 |         |       |       |     |                 | 6-spd automatic  | 8   | 320 |
| Chevrolet Tahoe         | LS          | 97,726  | Full-size SUV  | ICEV | Gasoline   | 2480    | 17  |      | \$43,600 |         |       |       |     |                 | 6-spd automatic  | 8   | 320 |
| Chevrolet Traverse      | LS          | 103,943 | Full-size SUV  | ICEV | Gasoline   | 2108    | 20  |      | \$30,795 |         |       |       |     |                 | 6-spd automatic  | 6   | 281 |
| Chevrolet Volt          | Base        | 18,805  | Compact Car    | PHEV | Prem. Gas. | 1717    | 37  | 97   | \$34,185 | \$7,500 |       | 17    | ser | 1-spd automatic | 0                | 149 |     |
| Chrysler 200            | LX          | 117,363 | Mid-size Car   | ICEV | Gasoline   | 1543    | 24  |      | \$21,795 |         |       |       |     |                 | 4-spd automatic  | 4   | 173 |
| Chrysler 300            | Base        | 53,382  | Full-size Car  | ICEV | Gasoline   | 1797    | 23  |      | \$31,395 |         |       |       |     |                 | 8-spd automatic  | 6   | 292 |
| Chrysler Town & Country | Touring     | 138,040 | Car            | ICEV | Gasoline   | 2110    | 20  |      | \$30,765 |         |       |       |     |                 | 6-spd automatic  | 6   | 283 |
| Dodge Avenger           | SE          | 51,705  | Mid-size Car   | ICEV | Gasoline   | 1542    | 24  |      | \$20,595 |         |       |       |     |                 | 4-spd automatic  | 4   | 173 |
| Dodge Challenger        | SXT         | 51,611  | Sports Car     | ICEV | Gasoline   | 1739    | 21  |      | \$26,495 |         |       |       |     |                 | 5-spd automatic  | 6   | 305 |
| Dodge Charger           | SE          | 94,099  | Sports Car     | ICEV | Gasoline   | 1797    | 21  |      | \$26,995 |         |       |       |     |                 | 5-spd automatic  | 6   | 292 |
| Dodge Dart              | SE          | 83,858  | Compact Car    | ICEV | Gasoline   | 1445    | 29  |      | \$16,495 |         |       |       |     |                 | 6-spd manual     | 4   | 160 |
| Dodge Durango           | SXT         | 64,398  | Full-size SUV  | ICEV | Gasoline   | 2157    | 21  |      | \$29,995 |         |       |       |     |                 | 8-spd automatic  | 6   | 290 |

**Table S4 Continued:** Input data for all vehicles analyzed

| Description           |            | Input   |                |      |          |         |     |      |          |         |       |       |    |      | Trim Information |    |     |
|-----------------------|------------|---------|----------------|------|----------|---------|-----|------|----------|---------|-------|-------|----|------|------------------|----|-----|
| Model                 | Trim       | # Sold  | Class          | Type | Fuel     | Cweight | FE  | FE/2 | MSRP     | Ftax    | Pbatt | Ebatt | FC | PCon | Transmission     | Gr | Pwr |
| Dodge Grand Caravan   | AVP/SE     | 134,152 | Car            | ICEV | Gasoline | 1960    | 20  |      | \$20,895 |         |       |       |    |      | 6-spd automatic  | 6  | 283 |
| Dodge Journey         | SE         | 93,572  | Mid-size SUV   | ICEV | Gasoline | 1732    | 22  |      | \$19,995 |         |       |       |    |      | 4-spd automatic  | 4  | 173 |
| Fiat 500              | Lounge     | 32,205  | Subcompact Car | ICEV | Gasoline | 1096    | 34  |      | \$18,500 |         | 40    |       |    |      | 5-spd manual     | 4  | 101 |
| Fiat 500E             | Base       | 1,503   | Subcompact Car | BEV  | Gasoline | 1352    | 115 |      | \$31,800 | \$7,500 |       | 24    |    |      | 1-spd automatic  | 0  | 111 |
| Ford C-Max Energi     | SEL        | 8,433   | Compact Car    | PHEV | Gasoline | 1750    | 38  | 88   | \$31,635 | \$4,007 |       | 8     |    | s-p  | 2-spd CVT        | 4  | 141 |
| Ford C-Max Hybrid     | SEL        | 19,162  | Compact Car    | HEV  | Gasoline | 1636    | 39  |      | \$27,170 |         | 40    |       |    |      | 2-spd CVT        | 4  | 141 |
| Ford Edge             | SE         | 108,864 | Mid-size SUV   | ICEV | Gasoline | 1840    | 22  |      | \$28,100 |         |       |       |    |      | 6-spd automatic  | 6  | 285 |
| Ford Escape           | S          | 306,212 | Compact SUV    | ICEV | Gasoline | 1588    | 25  |      | \$23,100 |         |       |       |    |      | 6-spd automatic  | 4  | 168 |
| Ford Explorer         | Base       | 189,339 | Mid-size SUV   | ICEV | Gasoline | 2057    | 20  |      | \$30,015 |         |       |       |    |      | 6-spd automatic  | 6  | 290 |
| Ford F-Series         | XL         | 753,851 | Pickup         | ICEV | Gas/E85  | 2125    | 19  |      | \$25,025 |         |       |       |    |      | 6-spd automatic  | 6  | 302 |
| Ford Fiesta           | S          | 63,192  | Subcompact Car | ICEV | Gasoline | 1151    | 31  |      | \$14,100 |         |       |       |    |      | 5-spd manual     | 4  | 120 |
| Ford Focus            | Titanium   | 217,670 | Compact Car    | ICEV | Gasoline | 1386    | 31  |      | \$24,065 |         |       |       |    |      | 6-spd AS manual  | 4  | 160 |
| Ford Focus Electric   | Base**     | 1,964   | Compact Car    | BEV  | Gas/E85  | 1651    | 105 |      | \$30,165 | \$7,500 |       | 23    |    |      | 1-spd automatic  | 0  | 143 |
| Ford Fusion           | Titanium** | 259,905 | Mid-size Car   | ICEV | Gasoline | 1577    | 26  |      | \$23,935 |         |       |       |    |      | 6-spd automatic  | 4  | 175 |
| Ford Fusion Energi    | SE Luxury  | 11,550  | Mid-size Car   | PHEV | Gasoline | 1775    | 38  | 88   | \$32,590 | \$4,007 |       | 8     |    | s-p  | 2-spd CVT        | 4  | 141 |
| Ford Fusion Hybrid    | Titanium** | 35,405  | Mid-size Car   | HEV  | Gasoline | 1640    | 42  |      | \$27,280 |         | 40    |       |    |      | 2-spd CVT        | 4  | 141 |
| Ford Mustang          | V6         | 82,635  | Sports Car     | ICEV | Gasoline | 1588    | 22  |      | \$22,510 |         |       |       |    |      | 6-spd manual     | 6  | 305 |
| Ford Taurus           | SE         | 52,395  | Full-size Car  | ICEV | Gasoline | 1830    | 22  |      | \$26,780 |         |       |       |    |      | 6-spd automatic  | 6  | 288 |
| GMC Acadia            | SLE-1      | 83,972  | Full-size SUV  | ICEV | Gasoline | 2112    | 20  |      | \$34,485 |         |       |       |    |      | 6-spd automatic  | 6  | 288 |
| GMC Sierra            | Base       | 211,833 | Pickup         | ICEV | Gasoline | 2072    | 20  |      | \$26,075 |         |       |       |    |      | 6-spd automatic  | 6  | 285 |
| GMC Terrain           | SLE-1      | 105,016 | Mid-size SUV   | ICEV | Gasoline | 1748    | 26  |      | \$26,465 |         |       |       |    |      | 6-spd automatic  | 4  | 182 |
| Honda Accord          | EX**       | 374,397 | Mid-size Car   | ICEV | Gasoline | 1500    | 28  |      | \$25,680 |         |       |       |    |      | 2-spd CVT        | 4  | 185 |
| Honda Accord Hybrid   | Base       | 13,977  | Mid-size Car   | HEV  | Gasoline | 1610    | 47  |      | \$29,155 |         | 40    |       |    |      | 1-spd CVT        | 4  | 141 |
| Honda Civic           | EX         | 320,911 | Mid-size Car   | ICEV | Gasoline | 1288    | 33  |      | \$21,090 |         |       |       |    |      | 2-spd CVT        | 4  | 143 |
| Honda Civic Hybrid    | Base       | 5,070   | Mid-size Car   | HEV  | Gasoline | 1306    | 45  |      | \$24,635 |         | 40    |       |    |      | 2-spd CVT        | 4  | 90  |
| Honda CR-V            | LX         | 335,019 | Compact SUV    | ICEV | Gasoline | 1499    | 26  |      | \$23,120 |         |       |       |    |      | 5-spd automatic  | 4  | 185 |
| Honda Fit [2015]      | LX         | 59,340  | Subcompact Car | ICEV | Gasoline | 1140    | 32  |      | \$15,650 |         |       |       |    |      | 6-spd manual     | 4  | 130 |
| Honda Odyssey         | LX         | 122,738 | Car            | ICEV | Gasoline | 1994    | 22  |      | \$28,825 |         |       |       |    |      | 6-spd automatic  | 6  | 248 |
| Honda Pilot           | LX         | 108,857 | Mid-size SUV   | ICEV | Gasoline | 1950    | 21  |      | \$29,670 |         |       |       |    |      | 5-spd automatic  | 6  | 250 |
| Hyundai Accent        | GLS        | 63,309  | Subcompact Car | ICEV | Gasoline | 1125    | 31  |      | \$14,645 |         |       |       |    |      | 6-spd manual     | 4  | 138 |
| Hyundai Elantra       | SE         | 222,023 | Compact Car    | ICEV | Gasoline | 1258    | 31  |      | \$17,200 |         |       |       |    |      | 6-spd manual     | 4  | 145 |
| Hyundai Santa Fe      | GLS        | 107,906 | Mid-size SUV   | ICEV | Gasoline | 1771    | 21  |      | \$29,900 |         |       |       |    |      | 6-spd automatic  | 6  | 290 |
| Hyundai Sonata        | SE         | 195,884 | Mid-size Car   | ICEV | Gasoline | 1523    | 28  |      | \$24,300 |         |       |       |    |      | 6-spd automatic  | 4  | 192 |
| Hyundai Sonata Hybrid | Base       | 21,052  | Mid-size Car   | HEV  | Gasoline | 1568    | 38  |      | \$26,000 |         | 40    |       |    |      | 6-spd automatic  | 4  | 159 |
| Jeep Cherokee         | Sport      | 178,508 | Mid-size SUV   | ICEV | Gasoline | 1669    | 25  |      | \$22,995 |         |       |       |    |      | 9-spd automatic  | 4  | 184 |



Table S4 Continued: Input data for all vehicles analyzed

| Description                 |           | Input   |                |      |            |         |     |      |          |         |       |       |    |      | Trim Information |    |     |
|-----------------------------|-----------|---------|----------------|------|------------|---------|-----|------|----------|---------|-------|-------|----|------|------------------|----|-----|
| Model                       | Trim      | # Sold  | Class          | Type | Fuel       | Cweight | FE  | FE/2 | MSRP     | Ftax    | Pbatt | Ebatt | FC | PCon | Transmission     | Gr | Pwr |
| Jeep Compass                | Sport     | 61,264  | Compact SUV    | ICEV | Gasoline   | 1405    | 26  |      | \$18,795 |         |       |       |    |      | 5-spd manual     | 4  | 158 |
| Jeep Grand Cherokee         | Laredo    | 183,786 | Mid-size SUV   | ICEV | Gas/E85    | 2062    | 20  |      | \$29,495 |         |       |       |    |      | 8-spd automatic  | 6  | 290 |
| Jeep Patriot                | Sport     | 93,462  | Compact SUV    | ICEV | Gasoline   | 1422    | 26  |      | \$16,395 |         |       |       |    |      | 5-spd manual     | 4  | 158 |
| Jeep Wrangler               | Sport     | 175,328 | Compact SUV    | ICEV | Gasoline   | 1760    | 19  |      | \$22,395 |         |       |       |    |      | 6-spd manual     | 6  | 285 |
| Kia Forte                   | LX        | 69,336  | Compact Car    | ICEV | Gasoline   | 1241    | 29  |      | \$15,900 |         |       |       |    |      | 6-spd manual     | 4  | 148 |
| Kia Optima                  | LX        | 145,244 | Mid-size Car   | ICEV | Gasoline   | 1468    | 27  |      | \$21,500 |         |       |       |    |      | 6-spd automatic  | 4  | 192 |
| Kia Optima Hybrid           | LX        | 13,776  | Mid-size Car   | HEV  | Gasoline   | 1586    | 38  |      | \$25,995 |         | 40    |       |    |      | 6-spd automatic  | 4  | 159 |
| Kia Sorento                 | LX        | 102,520 | Mid-size SUV   | ICEV | Gasoline   | 1630    | 22  |      | \$24,100 |         |       |       |    |      | 6-spd automatic  | 4  | 191 |
| Kia Soul                    | Base      | 145,316 | Compact Car    | ICEV | Gasoline   | 1231    | 26  |      | \$14,900 |         |       |       |    |      | 6-spd manual     | 4  | 130 |
| Lexus CT 200h               | Premium   | 17,673  | Compact Car    | HEV  | Gasoline   | 1420    | 41  |      | \$32,050 |         | 40    |       |    |      | 2-spd CVT        | 4  | 98  |
| Lexus ES 300h               | Base      | 14,837  | Full-size Car  | HEV  | Gasoline   | 1660    | 39  |      | \$39,500 |         | 40    |       |    |      | 2-spd CVT        | 4  | 156 |
| Lexus ES 350                | Base      | 57,671  | Full-size Car  | ICEV | Gasoline   | 1610    | 25  |      | \$36,620 |         |       |       |    |      | 6-spd automatic  | 6  | 268 |
| Lexus IS                    | Base      | 51,358  | Compact Car    | ICEV | Gasoline   | 1570    | 24  |      | \$36,100 |         |       |       |    |      | 6-spd automatic  | 6  | 204 |
| Lexus RX 350                | Base      | 98,139  | Mid-size SUV   | ICEV | Gasoline   | 1895    | 21  |      | \$39,760 |         |       |       |    |      | 6-spd automatic  | 6  | 270 |
| Lexus RX 450h               | Base      | 9,351   | Mid-size SUV   | HEV  | Gasoline   | 2050    | 30  |      | \$46,410 |         | 60    |       |    |      | 2-spd CVT        | 6  | 245 |
| Lincoln MKZ                 | Base      | 23,976  | Compact Car    | ICEV | Gasoline   | 1687    | 26  |      | \$35,190 |         |       |       |    |      | 6-spd automatic  | 4  | 240 |
| Lincoln MKZ Hybrid          | Base      | 10,033  | Compact Car    | HEV  | Gasoline   | 1736    | 37  |      | \$35,190 |         | 40    |       |    |      | 2-spd CVT        | 4  | 141 |
| Mazda 3                     | i SV      | 104,985 | Compact Car    | ICEV | Gasoline   | 1261    | 33  |      | \$16,945 |         |       |       |    |      | 6-spd manual     | 4  | 155 |
| Mazda 6                     | i Sport   | 53,224  | Mid-size Car   | ICEV | Gasoline   | 1444    | 29  |      | \$20,990 |         |       |       |    |      | 6-spd manual     | 4  | 184 |
| Mazda CX-5                  | Sport     | 99,122  | Compact SUV    | ICEV | Gasoline   | 1449    | 29  |      | \$21,395 |         |       |       |    |      | 6-spd manual     | 4  | 155 |
| Mercedes-Benz C-Class       | Sport     | 75,065  | Compact Car    | ICEV | Prem. Gas. | 1555    | 25  |      | \$35,800 |         |       |       |    |      | 7-spd automatic  | 4  | 201 |
| Mercedes-Benz E-Class       | Base      | 66,400  | Mid-size Car   | ICEV | Prem. Gas. | 1642    | 24  |      | \$51,900 |         |       |       |    |      | 7-spd automatic  | 6  | 302 |
| Nissan Altima               | 2.5       | 335,644 | Mid-size Car   | ICEV | Gasoline   | 1410    | 31  |      | \$22,170 |         |       |       |    |      | 2-spd CVT        | 4  | 182 |
| Nissan Frontier             | S         | 74,323  | Pickup         | ICEV | Gasoline   | 1682    | 21  |      | \$17,990 |         |       |       |    |      | 5-spd manual     | 4  | 152 |
| Nissan Leaf                 | S         | 30,200  | Compact Car    | BEV  | Gasoline   | 1477    | 113 |      | \$28,980 | \$7,500 |       | 24    |    |      | 1-spd automatic  | 0  | 107 |
| Nissan Maxima               | 3.5 S     | 50,401  | Full-size Car  | ICEV | Prem. Gas. | 1613    | 22  |      | \$31,290 |         |       |       |    |      | 2-spd CVT        | 6  | 290 |
| Nissan Pathfinder           | S         | 79,111  | Mid-size SUV   | ICEV | Gasoline   | 1891    | 22  |      | \$29,210 |         |       |       |    |      | 2-spd CVT        | 6  | 260 |
| Nissan Rogue                | S         | 199,199 | Mid-size SUV   | ICEV | Gasoline   | 1539    | 29  |      | \$22,790 |         |       |       |    |      | 2-spd CVT        | 4  | 170 |
| Nissan Sentra               | S         | 183,268 | Mid-size Car   | ICEV | Gasoline   | 1285    | 30  |      | \$15,990 |         |       |       |    |      | 6-spd manual     | 4  | 130 |
| Nissan Versa                | 1.6 S     | 139,781 | Subcompact Car | ICEV | Gasoline   | 1105    | 30  |      | \$11,990 |         |       |       |    |      | 5-spd manual     | 4  | 109 |
| Ram P/U                     | Tradesman | 439,789 | Pickup         | ICEV | Gasoline   | 2048    | 20  |      | \$25,060 |         |       |       |    |      | 8-spd automatic  | 6  | 305 |
| Smart Fortwo                | passion   | 7,859   | Subcompact Car | ICEV | Gasoline   | 827     | 36  |      | \$14,930 |         |       |       |    |      | 5-spd AS manual  | 3  | 70  |
| Smart Fortwo electric drive | passion   | 2,594   | Subcompact Car | BEV  | Gasoline   | 970     | 107 |      | \$25,000 | \$7,500 |       | 18    |    |      | 1-spd automatic  | 0  | 74  |
| Subaru Forester             | 2.5i      | 159,953 | Compact SUV    | ICEV | Gasoline   | 1490    | 25  |      | \$21,995 |         |       |       |    |      | 6-spd manual     | 4  | 170 |
| Subaru Impreza              | 2.0i      | 57,996  | Compact Car    | ICEV | Gasoline   | 1335    | 28  |      | \$17,895 |         |       |       |    |      | 5-spd manual     | 4  | 148 |

**Table S4 Continued:** Input data for all vehicles analyzed

| Description             |                | Input   |                |      |          |         |     |      |          |         |       |       |    |      | Trim Information |    |     |
|-------------------------|----------------|---------|----------------|------|----------|---------|-----|------|----------|---------|-------|-------|----|------|------------------|----|-----|
| Model                   | Trim           | # Sold  | Class          | Type | Fuel     | Cweight | FE  | FE/2 | MSRP     | Ftax    | Pbatt | Ebatt | FC | PCon | Transmission     | Gr | Pwr |
| Subaru Legacy           | 2.5i           | 52,270  | Mid-size Car   | ICEV | Gasoline | 1504    | 24  |      | \$20,295 |         |       |       |    |      | 6-spd manual     | 4  | 173 |
| Subaru Outback          | 2.5i           | 138,790 | Mid-size SUV   | ICEV | Gasoline | 1553    | 25  |      | \$23,495 |         |       |       |    |      | 6-spd manual     | 4  | 173 |
| Subaru XV Crosstrek     | 2.0i Premium   | 70,956  | Compact SUV    | ICEV | Gasoline | 1405    | 26  |      | \$21,995 |         |       |       |    |      | 5-spd manual     | 4  | 148 |
| Tesla Model 3***        | 0              | 0       | Compact Car    | BEV  | Gasoline | 1565    | 125 |      | \$35,000 |         |       | 55    |    |      | 1-spd automatic  | 0  | 201 |
| Tesla Model S           | Base (60kWh)   | 16,550  | Full-size Car  | BEV  | Gasoline | 2108    | 95  |      | \$69,900 | \$7,500 |       | 60    |    |      | 1-spd automatic  | 0  | 302 |
| Toyota 4Runner          | SR5            | 76,906  | Mid-size SUV   | ICEV | Gasoline | 1996    | 19  |      | \$32,820 |         |       |       |    |      | 5-spd automatic  | 6  | 270 |
| Toyota Avalon           | XLE Premium    | 50,135  | Full-size Car  | ICEV | Gasoline | 1578    | 25  |      | \$33,445 |         |       |       |    |      | 6-spd automatic  | 6  | 268 |
| Toyota Avalon Hybrid    | XLE Premium    | 17,048  | Full-size Car  | HEV  | Gasoline | 1630    | 39  |      | \$35,805 |         | 40    |       |    |      | 2-spd CVT        | 4  | 156 |
| Toyota Camry            | LE             | 389,091 | Mid-size Car   | ICEV | Gasoline | 1453    | 29  |      | \$22,870 |         |       |       |    |      | 6-spd automatic  | 4  | 178 |
| Toyota Camry Hybrid     | LE             | 39,515  | Mid-size Car   | HEV  | Gasoline | 1551    | 41  |      | \$26,790 |         | 40    |       |    |      | 2-spd CVT        | 4  | 156 |
| Toyota Corolla/Matrix   | L              | 339,498 | Compact Car    | ICEV | Gasoline | 1270    | 31  |      | \$16,800 |         |       |       |    |      | 6-spd manual     | 4  | 132 |
| Toyota Highlander       | LE             | 146,127 | Mid-size SUV   | ICEV | Gasoline | 1875    | 22  |      | \$29,215 |         |       |       |    |      | 6-spd automatic  | 4  | 185 |
| Toyota Mirai            | 0              | 1       | Mid-size Car   | FCV  | Hydrogen | 1850    | 66  |      | \$57,500 | \$7,500 | 40    |       | 90 |      | 1-spd direct     | 0  | 151 |
| Toyota Prius            | Two            | 122,776 | Mid-size Car   | HEV  | Gasoline | 1380    | 49  |      | \$24,200 |         | 40    |       |    |      | 2-spd CVT        | 4  | 98  |
| Toyota Prius C          | One            | 40,570  | Subcompact Car | HEV  | Gasoline | 1134    | 49  |      | \$19,080 |         | 40    |       |    |      | 2-spd CVT        | 4  | 73  |
| Toyota Prius Plug-In    | Base           | 13,264  | Mid-size Car   | PHEV | Gasoline | 1436    | 50  | 95   | \$29,990 | \$1,500 |       | 4     |    | s-p  | 2-spd CVT        | 4  | 98  |
| Toyota Prius V          | Two            | 30,762  | Full-size Car  | HEV  | Gasoline | 1485    | 42  |      | \$26,750 |         | 40    |       |    |      | 2-spd CVT        | 4  | 98  |
| Toyota RAV4             | XLE            | 266,514 | Compact SUV    | ICEV | Gasoline | 1577    | 27  |      | \$25,000 |         |       |       |    |      | 6-spd automatic  | 4  | 176 |
| Toyota RAV4 EV          | Base           | 1,184   | Compact SUV    | BEV  | Gasoline | 1829    | 76  |      | \$49,800 | \$7,500 |       | 42    |    |      | 1-spd automatic  | 0  | 154 |
| Toyota Sienna           | L V6           | 124,502 | Car            | ICEV | Gasoline | 1955    | 21  |      | \$26,920 |         |       |       |    |      | 6-spd automatic  | 6  | 266 |
| Toyota Tacoma           | Base           | 155,041 | Pickup         | ICEV | Gasoline | 1508    | 23  |      | \$18,125 |         |       |       |    |      | 5-spd manual     | 4  | 159 |
| Toyota Tundra           | SR V6          | 118,493 | Pickup         | ICEV | Gasoline | 2159    | 18  |      | \$26,200 |         |       |       |    |      | 5-spd automatic  | 6  | 270 |
| Volkswagen Jetta Hybrid | Base           | 1,939   | Compact Car    | HEV  | Gasoline | 1502    | 45  |      | \$25,560 |         | 40    |       |    |      | 7-spd AS manual  | 4  | 150 |
| Volkswagen Jetta Sedan  | 2.0L S         | 122,192 | Compact Car    | ICEV | Gasoline | 1288    | 28  |      | \$16,895 |         |       |       |    |      | 5-spd manual     | 4  | 115 |
| Volkswagen Jetta TDI    | 2.0L TDI Value | 0       | Compact Car    | ICEV | Diesel   | 1470    | 34  |      | \$21,295 |         |       |       |    |      | 6-spd manual     | 4  | 140 |
| Volkswagen Passat       | 1.8T SE        | 96,649  | Mid-size Car   | ICEV | Gasoline | 1482    | 28  |      | \$25,875 |         |       |       |    |      | 6-spd automatic  | 4  | 170 |
| Volkswagen Passat TDI   | 2.0L TDI SE    | 0       | Mid-size Car   | ICEV | Diesel   | 1539    | 35  |      | \$26,675 |         |       |       |    |      | 6-spd manual     | 4  | 140 |

\* The BMW i3 was modeled with a lightweight material mix to account for the heavy use of carbon fiber within its chassis. Only 50% of the emission penalty (as modeled by GREET) was awarded, since BMW claims to use renewable electricity for the final production stages of the carbon fiber parts.

\*\* These trims were modified further to correspond more closely to the respective HEV, PHEV, or BEV trims. See footnotes below Table S5 for details.

\*\*\* The curb weight, fuel economy, and (for the Tesla Model 3) battery size were estimated based on early projections and properties of models of similar size and shape.

Table S5: List of vehicle models for which a trim other than the most basic (most affordable) trim was chosen in order to match the feature set of the most basic HEV, PHEV, or BEV version of the same model.

| Model               | Basic trim |          |              | Chosen trim |          |              | Matched with                    |
|---------------------|------------|----------|--------------|-------------|----------|--------------|---------------------------------|
|                     | Name       | MSRP     | Fuel economy | Name        | MSRP     | Fuel economy |                                 |
| Chevrolet Cruze     | LS Manual  | \$17,520 | 29           | 2LT Auto    | \$22,580 | 30           | Cruze Diesel (Diesel ICEV)      |
| Chevrolet Spark     | LS Manual  | \$12,170 | 34           | 1LT Auto    | \$14,995 | 33           | Spark EV 1LT (BEV)              |
| FIAT 500            | Pop        | \$16,445 | 34           | Lounge      | \$18,500 | 34           | 500e Battery Electric (BEV)     |
| Ford C-Max Hybrid   | SE         | \$24,170 | 39           | SEL         | \$27,170 | 39           | C-Max Energi SEL (PHEV)         |
| Ford Focus          | S          | \$16,810 | 30           | Titanium    | \$24,065 | 31           | Focus Electric Base (BEV)       |
| Ford Focus Electric | Base       | \$29,170 | 104          | Base*       | \$30,165 | 104          | Focus Titanium (ICEV)           |
| Ford Fusion         | S          | \$21,970 | 26           | Titanium**  | \$28,800 | 26           | Fusion Energi SE Luxury (PHEV)  |
| Ford Fusion Hybrid  | S          | \$26,270 | 42           | Titanium**  | \$30,800 | 42           | Fusion Energi SE Luxury (PHEV)  |
| Honda Accord        | LX         | \$21,955 | 28           | EX***       | \$25,680 | 28           | Accord Hybrid Base (HEV)        |
| Honda Civic         | LX         | \$18,190 | 31           | EX          | \$21,090 | 33           | Civic Hybrid Base (HEV)         |
| Hyundai Sonata      | GLS        | \$21,450 | 28           | SE          | \$24,300 | 28           | Sonata Hybrid Base (HEV)        |
| smart fortwo        | pure       | \$13,270 | 36           | passion     | \$14,930 | 36           | fortwo electric passion (BEV)   |
| Toyota Avalon       | XLE        | \$31,590 | 25           | XLE Premium | \$33,445 | 25           | Avalon Hybrid XLE Premium (HEV) |
| Toyota Camry        | L          | \$22,425 | 29           | LE          | \$22,870 | 29           | Camry Hybrid LE (HEV)           |
| Toyota RAV4         | LE         | \$23,550 | 27           | XLE         | \$25,000 | 27           | RAV4 EV Base (BEV)              |
| Volkswagen Jetta    | 2.0L Base  | \$15,695 | 28           | 2.0L S      | \$16,895 | 28           | Jetta Hybrid Base (HEV)         |
| Volkswagen Passat   | 1.8T S     | \$22,095 | 28           | 1.8T SE     | \$25,875 | 28           | Passat 2.0L TDI SE              |

\* The leather seat option (\$995) was added to this trim to match the seats of the Ford Focus Titanium.

\*\* The price of this trim was decreased by \$1800 to match the ‘SE Luxury’ (rather than the ‘Titanium’) feature set of the Ford Fusion Energi.

\*\*\* The CVT transmission option (\$800) was added manually to this trim to match the transmission system of the Honda Accord Hybrid.

## References

- [1] Peters, G. P., Minx, J. C., Weber, C. L. & Edenhofer, O. Growth in emission transfers via international trade from 1990 to 2008. *Proceedings of the National Academy of Sciences* **108**, 8903–8908 (2011). URL <http://www.pnas.org/cgi/doi/10.1073/pnas.1006388108>.
- [2] Barrett, J. *et al.* Consumption-based GHG emission accounting: a UK case study. *Climate Policy* **13**, 451–470 (2013). URL <http://www.tandfonline.com/doi/abs/10.1080/14693062.2013.788858>.
- [3] IEA. World Energy Outlook 2012. Tech. Rep., International Energy Agency (2012).
- [4] Cole, J. BREAKING: Nissan Prices LEAF Battery Replacement at \$5,499, New Packs More Heat Durable (2014). URL <http://insideevs.com/breaking-nissan-prices-leaf-battery-replacement-5499-new-packs-heat-durable/>.
- [5] Blankenship, G. 2013 Model S Price Increase (2012). URL <https://www.teslamotors.com/blog/2013-model-s-price-increase>.
- [6] Greene, D. How Consumers Value Fuel Economy: A Literature Review How Consumers Value Fuel Economy EPA-420-R-10-008 (2010).
- [7] ANL. The Greenhouse Gases, Regulated Emissions, and Energy Use in Transportation (GREET) Model (2014). URL <https://greet.es.anl.gov/>.
- [8] IEA. IEA Website (2015). URL <http://www.iea.org>.
- [9] E85prices.com. E85 Prices (2015). URL <http://www.e85prices.com>.
- [10] Ramsden, T., Steward, D. & Zuboy, J. Analyzing the Levelized Cost of Centralized and Distributed Hydrogen Production Using the H2A Production Model , Version 2 Analyzing the Levelized Cost of Centralized and Distributed Hydrogen Production Using the H2A Production Model , Version 2 (2009).
- [11] Cars.com. New Cars, Used Cars, Car Reviews (2015). URL <http://www.cars.com/>.
- [12] Cain, T. 2013 U.S. Vehicle Sales Rankings By Model - Top 270 Best-Selling Vehicles In America - Every Vehicle Ranked (2014). URL <http://www.goodcarbadcar.net/2014/01/usa-vehicle-sales-rankings-by-model-december-2013-year-end.html>.
- [13] Cobb, J. December 2013 Dashboard (2014). URL <http://www.hybridcars.com/december-2013-dashboard/>.
- [14] Fueleconomy.gov. Fuel Economy (2015). URL <http://www.fueleconomy.gov/>.
